# Supplementary material
Source: Royal Society of Chemistry journal article supplement (doi:10.1039/d5mh01407g)
Supplement: d5mh01407g1.pdf [file d5mh01407g1.pdf]

# Supplementary Information for

## Core–Shell Mg–Ni Carbonate Supercapacitor Material by Concurrent Ni Recovery and CO<sub>2</sub> Mineralization

*Ying Wang<sup>1</sup>, Xueyi Liu<sup>1</sup>, Sebastien N. Kerisit<sup>2</sup> and Young-Shin Jun<sup>1,\*</sup>*

<sup>1</sup>Department of Energy, Environmental & Chemical Engineering, Washington University in St. Louis, St. Louis, Missouri 63130, United States

<sup>2</sup>Physical and Computational Sciences Directorate, Pacific Northwest National Laboratory, Richland, WA 99352, United States

Email: [ysjun@seas.wustl.edu](mailto:ysjun@seas.wustl.edu)

<http://encl.engineering.wustl.edu/>

*Materials Horizons*

\*To Whom Correspondence Should be Addressed

Summary: a total of 13 pages including 5 notes, 9 Figures and 3 Tables

**Table S1.** Comparison of magnesite and gaspéite compositions using different methods.

| Samples     | Theoretical values    |                       | TGA method            |                       | XRD method            |                       |
|-------------|-----------------------|-----------------------|-----------------------|-----------------------|-----------------------|-----------------------|
|             | MgCO <sub>3</sub> (%) | NiCO <sub>3</sub> (%) | MgCO <sub>3</sub> (%) | NiCO <sub>3</sub> (%) | MgCO <sub>3</sub> (%) | NiCO <sub>3</sub> (%) |
| Mg:Ni 20:5  | 74.0                  | 26.0                  | 73.5                  | 26.5                  | 76.6                  | 23.4                  |
| Mg:Ni 20:10 | 48.7                  | 41.3                  | 57.6                  | 42.4                  | 59.8                  | 40.2                  |
| Mg:Ni 20:20 | 41.5                  | 58.5                  | 38.4                  | 61.6                  | 51.2                  | 48.8                  |

**Table S2.** Electrochemical impedance spectroscopy (EIS) simulation results for pure NiCO<sub>3</sub> and MgCO<sub>3</sub>/NiCO<sub>3</sub> electrodes.

| Parameter                            | <i>R1</i> | <i>R2</i> | <i>R3</i> | <i>Q</i> | <i>C</i> |
|--------------------------------------|-----------|-----------|-----------|----------|----------|
| pure NiCO <sub>3</sub>               | 2.226     | 58710     | 172.4     | 0.00159  | 4.928E-4 |
| MgCO <sub>3</sub> /NiCO <sub>3</sub> | 2.237     | 18800     | 114.6     | 0.00193  | 6.597E-4 |

**Table S3.** Saturation ( $\sigma = \ln Q/K_{sp}$ ) with respect to magnesite and gaspéite and pH values at  $T = 180^\circ\text{C}$  and  $p\text{CO}_2 = 100$  bar.

| Mg :<br>Ni ratio | 20 mM :<br>0 mM | 20 mM :<br>5 mM | 20 mM :<br>10 mM | 20 mM :<br>20 mM | 0 mM :<br>20 mM |
|------------------|-----------------|-----------------|------------------|------------------|-----------------|
| Magnesite        | 9.46            | 9.46            | 9.44             | 9.39             | --              |
| Gaspéite         | --              | 7.90            | 8.57             | 9.16             | 9.21            |
| pH               | 5.76            | 5.76            | 5.76             | 5.75             | 5.76            |

### Note S1: Thermogravimetric Analysis (TGA) weight percentage calculations

$$X + Y = 1 \quad \text{Eq. S1}$$

$$1 - L = 0.478 \times X + 0.6292 \times Y \quad \text{Eq. S2}$$

where  $X$  was the weight percentage for gaspéite,  $Y$  was the weight percentage for magnesite, and  $L$  was the weight loss percentage obtained from TGA. By solving the equations above, we can derive the formulas provided in **Eqs. 5** and **6** of the main text.

### Note S2: Density Functional Theory Calculations

Two series of calculations were performed. The first series of calculations used the PBE0 functional and aimed at determining the energy of the decomposition reaction  $M\text{CO}_3(\text{s}) \rightarrow M\text{O}(\text{s}) + \text{CO}_2(\text{g})$  for  $M = \text{Mg}$  or  $\text{Ni}$ . For the solid phases, constant-pressure energy minimizations (the ionic positions, cell volume, and cell shape are allowed to relax) of the full unit cell were performed by progressively increasing the size of the  $k$ -point mesh until the difference between the total energies per formula unit of two consecutive energy minimizations was less than 0.01 eV. For  $\text{CO}_2$ , a constant-volume energy minimization was performed at the  $\Gamma$  point with a cubic cell with a side length of 12 Å.

The second series of calculations used the PBE-D3 functional and focused on calculating the interfacial energy between the  $(10\bar{1}4)$  surfaces of magnesite and gaspéite.  $2 \times 1 \times 5$  magnesite and gaspéite slabs (20 formula units) exposing the  $(10\bar{1}4)$  surface was generated from the energy-minimized full unit cells. The magnesite and gaspéite slabs had surface areas of 68.964 Å<sup>2</sup> and 68.268 Å<sup>2</sup>, respectively. A magnesite-gaspéite interface was generated by joining the magnesite and gaspéite slabs using the magnesite surface area to represent magnesite serving as a substrate for gaspéite growth. A monolayer of water molecules (4 per slab face or 1 per surface cation) was

adsorbed on each face of the slabs. The results of constant-volume energy minimizations were used to calculate the magnesite-water, gaspéite-water and magnesite-gaspéite interfacial energies:

$$\alpha_i = \frac{E_{slab}^{l,m,n} - l \times E_{bulk}^{MgCO_3} - m \times E_{bulk}^{NiCO_3} - n \times E_{bulk}^{ice XI}}{pA} - \gamma_j \quad \text{Eq. S3}$$

where  $i$  is  $ls$  (*i.e.*, liquid-substrate) for the magnesite-water interface,  $lc$  (*i.e.*, liquid-crystal) for the gaspéite-water interface or  $sc$  (*i.e.*, substrate-crystal) for the magnesite-gaspéite interface,  $E_{slab}^{l,m,n}$  is the energy of a slab/interface with  $l$   $MgCO_3$  units,  $m$   $NiCO_3$  units, and  $n$  water molecules,  $E_{bulk}^{MgCO_3}$  and  $E_{bulk}^{NiCO_3}$  are the bulk energies of magnesite and gaspéite, respectively, per stoichiometric unit,  $E_{bulk}^{ice XI}$  is the bulk energy of ice XI per  $H_2O$  molecule,  $p$  is 2 for the magnesite-water and gaspéite-water interfaces and 1 for the magnesite-gaspéite interface, and  $A$  is the surface area. Following Prange et al. (2018), ice XI was chosen as the reference phase for  $H_2O$  rather than liquid water because the DFT calculations did not account for temperature.<sup>1</sup> Ice XI is the equilibrium structure of ice below  $\sim 70$  K at ambient pressure and is the hydrogen-ordered form of ordinary ice. The term  $\gamma_j$  subtracts the energy of the interfaces in the simulation cells that are not of interest, *i.e.*, the water-vacuum interfacial energy ( $\gamma_{lv}$ ) for the magnesite-water ( $\alpha_{ls}$ ) and gaspéite-water interfaces ( $\alpha_{lc}$ ) and the sum of the magnesite-water-vacuum ( $\gamma_{slv}$ ) and gaspéite-water-vacuum ( $\gamma_{clv}$ ) interfacial energies for the magnesite-gaspéite interface ( $\alpha_{sc}$ ). These quantities are defined as:

$$\gamma_{lv} = \frac{E_{ML}^n - n \times E_{bulk}^{ice XI}}{2A} \quad \text{Eq. S4}$$

And

$$\gamma_{slv/clv} = \frac{E_{slab}^{m,n} - m \times E_{bulk}^{MgCO_3/NiCO_3} - n \times E_{bulk}^{ice XI}}{2A} \quad \text{Eq. S5}$$

where  $E_{ML}^n$  is the energy of a monolayer (ML) of water molecules whose positions are those in the magnesite-water or gaspéite-water interface.

**Note S3: Galvanostatic charge–discharge (GCD) measurements**

Galvanostatic charge–discharge (GCD) measurements were carried out in a three-electrode system to assess the charge-storage behavior of the MgCO<sub>3</sub>@NiCO<sub>3</sub> electrode. The composite material was used as the working electrode, with a Pt mesh counter electrode and an Ag/AgCl reference electrode in 2 M KOH. GCD curves were collected at a series of current densities to probe the rate capability of the electrode.

**Note S4: Asymmetric supercapacitor (ASC) configuration and electrochemical measurements**

In the two-electrode ASC setup, MgCO<sub>3</sub>@NiCO<sub>3</sub> (R = 4 mm) and activated carbon (AC) served as the positive and negative electrodes, respectively, with 2 M KOH as the electrolyte. The energy density (E) and power density (P) were determined using **Equations S6 and S7**, based on the discharge profiles obtained from galvanostatic charge–discharge measurements.

$$E = I/2 \times C_s \times \Delta V^2 \quad \text{Eq. S6}$$

$$P = E/\Delta t \quad \text{Eq. S7}$$

Here,  $C_s$  represents the specific capacitance (F/cm<sup>2</sup>),  $\Delta V$  is the potential window (V), and  $\Delta t$  is the discharge time (s). The energy density reflects the amount of energy stored per unit mass or area, while the power density indicates how quickly this energy can be delivered.

**Note S5: Electrochemical Testing of Commercial Ni(OH)<sub>2</sub> Electrode**

Electrochemical characterization, including CV, and cycling stability of the commercial Ni(OH)<sub>2</sub> electrode was performed using a three-electrode configuration, with the Ni(OH)<sub>2</sub> material as the working electrode, a Pt mesh as the counter electrode, and an Ag/AgCl electrode as the reference. All measurements were carried out in a 2 M KOH electrolyte under a scan rate of 50 mV/s.

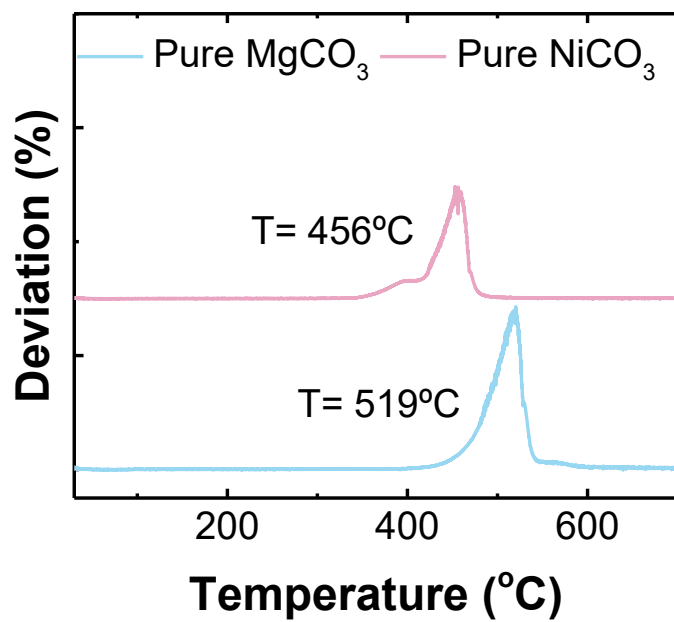

**Figure S1.** The weight deviation observed from TGA indicates that the decomposition temperatures for magnesite and gaspéite are 519°C and 456°C, respectively.

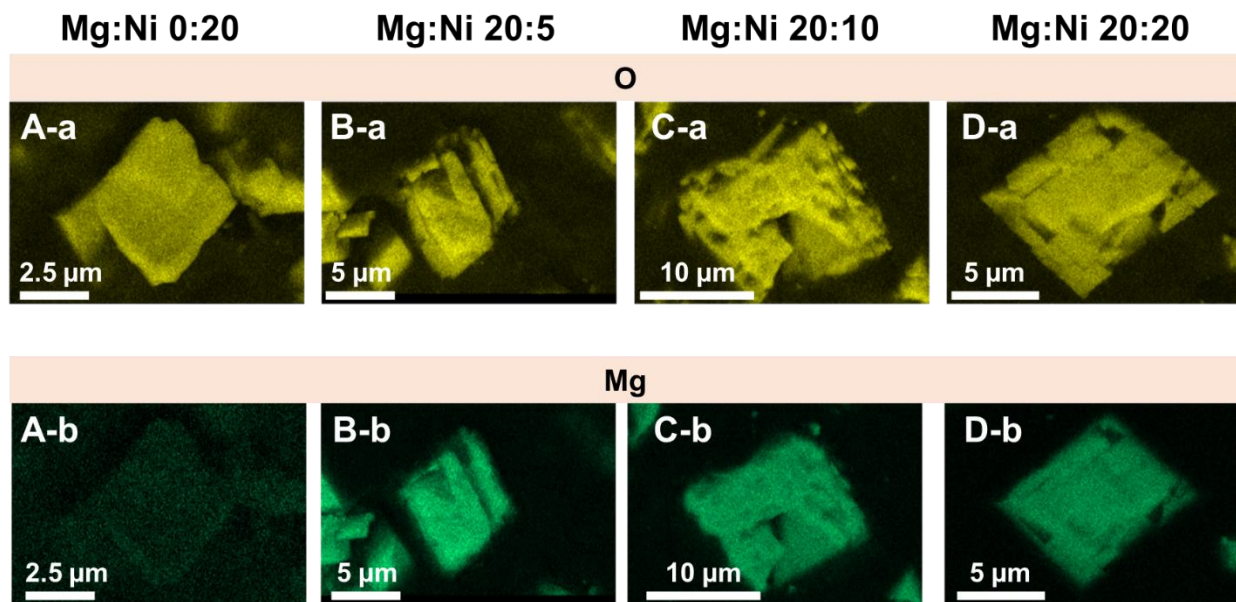

**Figure S2.** Mapping of elements O and Mg for different Mg to Ni ratio samples. The top row (A-a, B-a, C-a, D-a) shows the O distribution in the crystals. The bottom row (A-b, B-b, C-b, D-b) displays the distribution of Mg in the same crystals.

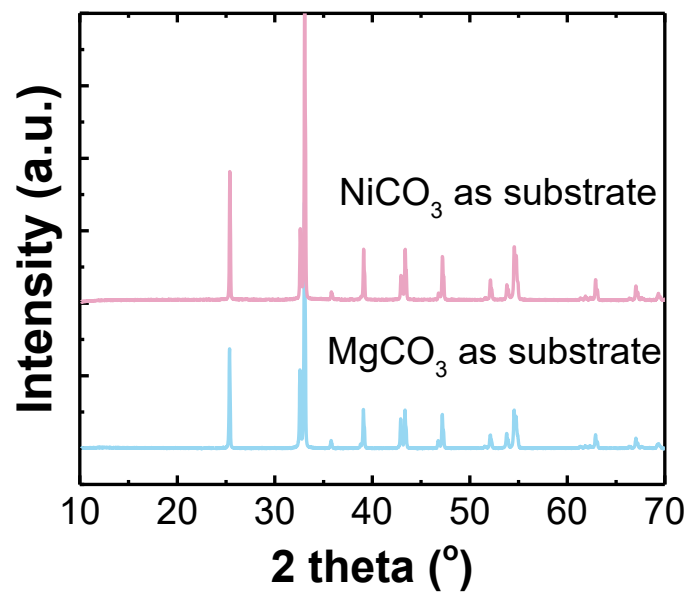

**Figure S3.** The XRD was obtained through a two-step experiment where the sequence of adding  $\text{Mg}(\text{NO}_3)_2$  and  $\text{Ni}(\text{NO}_3)_2$  was varied. The results showed that the final compositions were the same, regardless of the addition sequence.

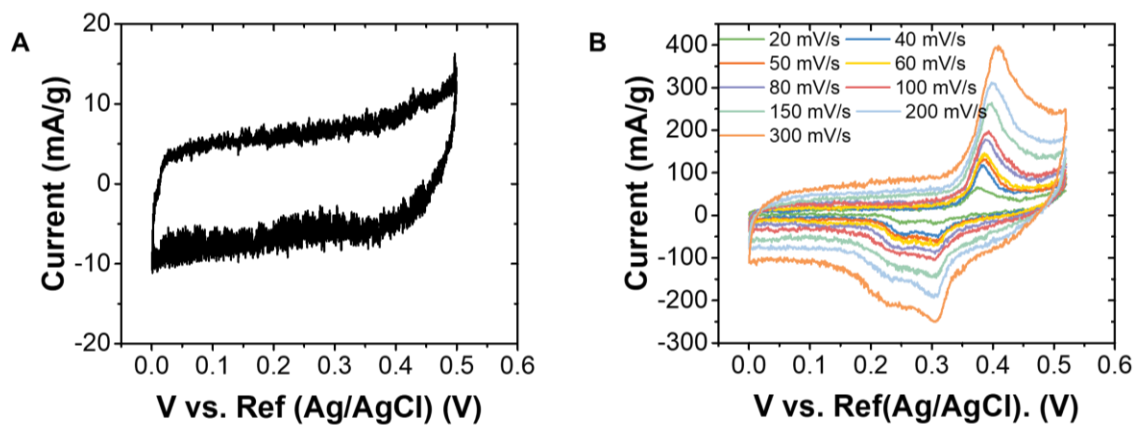

**Figure S4.** CV test for carbon papers and pure gaspéite. **(A)** The CV curves for carbon paper (control experiment). **(B)** CV curves for pure gaspéite as control material, with scan rates ranging from 20 mV/s to 300 mV/s.

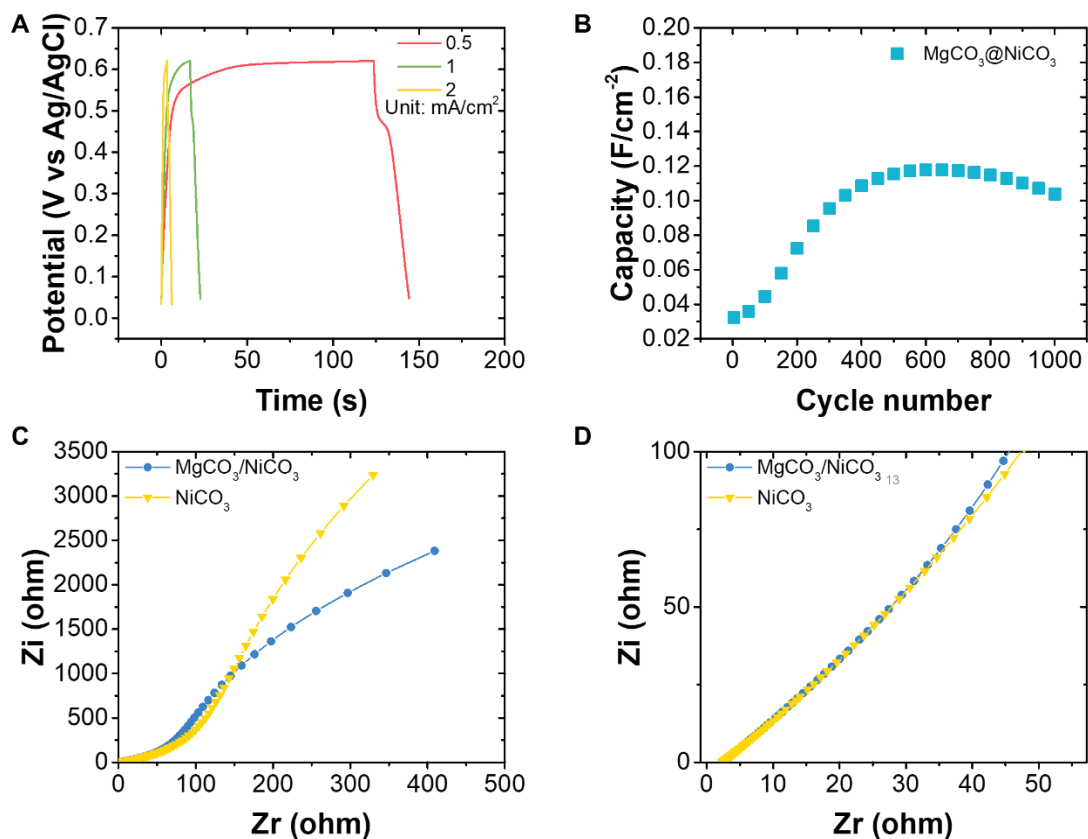

**Figure S5.** Electrochemical tests for  $\text{MgCO}_3@\text{NiCO}_3$ . **(A)** Galvanostatic charge–discharge (GCD) curves of the  $\text{NiCO}_3$  electrode at 0.5, 1, 2  $\text{mA/cm}^2$ ; **(B)** Cycling stability of the  $\text{MgCO}_3@\text{NiCO}_3$  electrode obtained from CV measurements at  $50 \text{ mV s}^{-1}$  over 1000 cycles. **(C)** Electrochemical impedance spectroscopy (EIS) Nyquist plots of  $\text{NiCO}_3$  and  $\text{MgCO}_3@\text{NiCO}_3$  electrodes. **(D)** Enlarged high-frequency region of the Nyquist plots highlighting the solution resistance and semicircle features used in fitting with the  $R_1(\text{CR}_2)(\text{QR}_3)$  equivalent circuit.

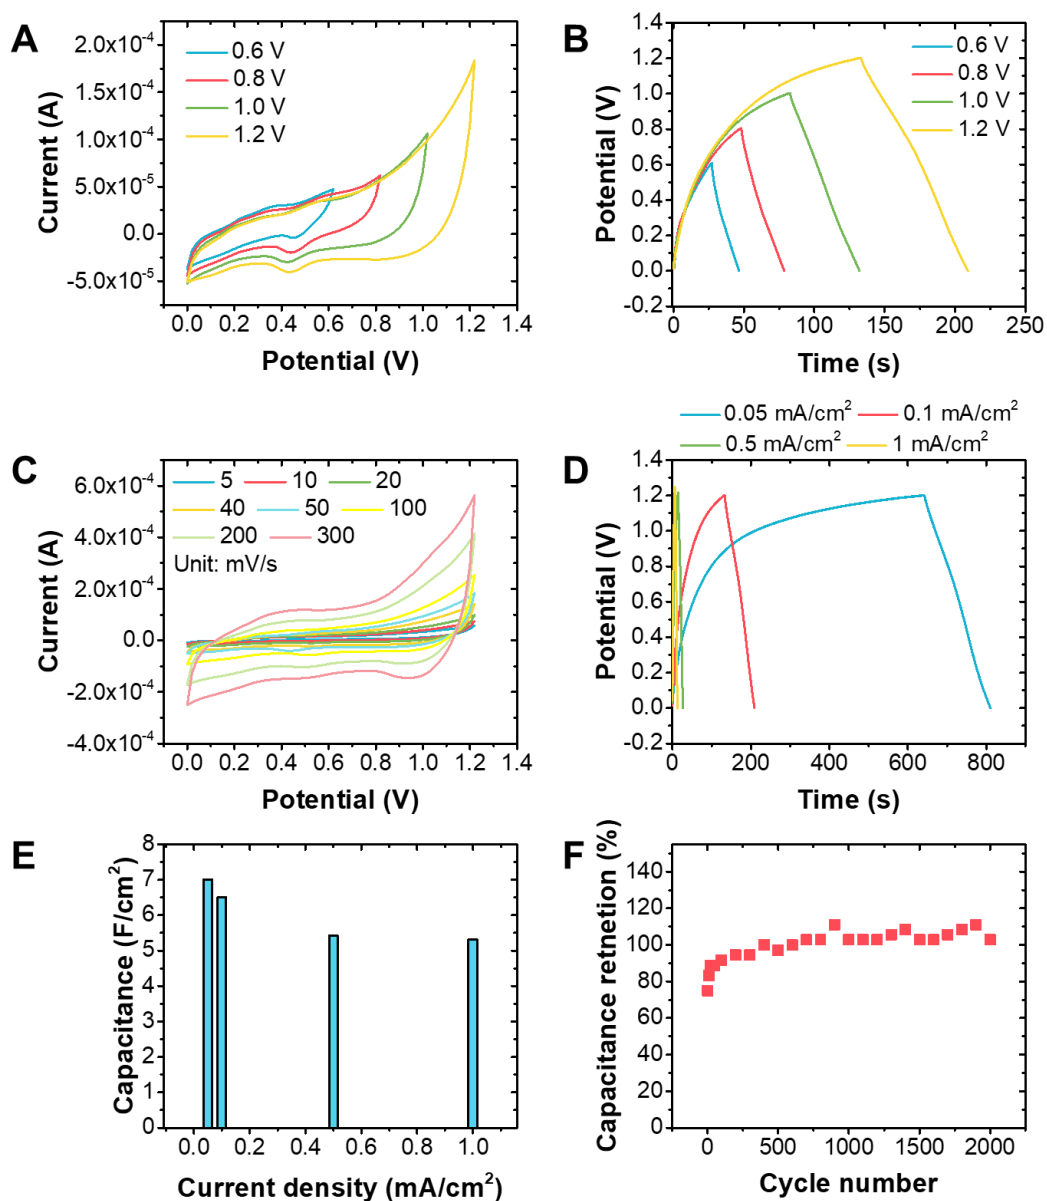

**Figure S6.** Electrochemical properties test of ASC in a two-electrate system. **(A)** CV curves of the MgCO<sub>3</sub>@NiCO<sub>3</sub> // AC ASC measured at 50 mV s<sup>-1</sup> under different potential windows. **(B)** GCD curves of the MgCO<sub>3</sub>@NiCO<sub>3</sub> // AC ASC recorded at 0.1 mA cm<sup>-2</sup> across various potential windows. **(C)** CV curves of the MgCO<sub>3</sub>@NiCO<sub>3</sub> // AC ASC at different scan rates. **(D)** GCD curves of the MgCO<sub>3</sub>@NiCO<sub>3</sub> // AC ASC at different current densities. **(E)** Specific capacitance of the ASC device as a function of current density. **(F)** Cycling performance of the ASC device over 2000 cycles at a current density of 0.1 mA cm<sup>-2</sup>.

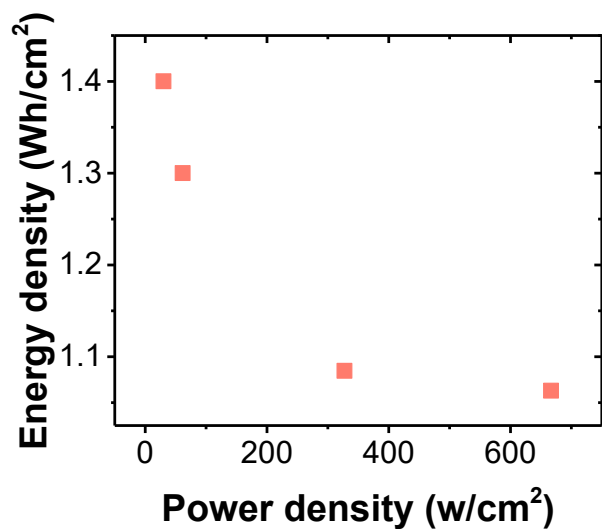

**Figure S7.** Ragone plot of  $\text{MgCO}_3@\text{NiCO}_3 // \text{AC}$  electrode.

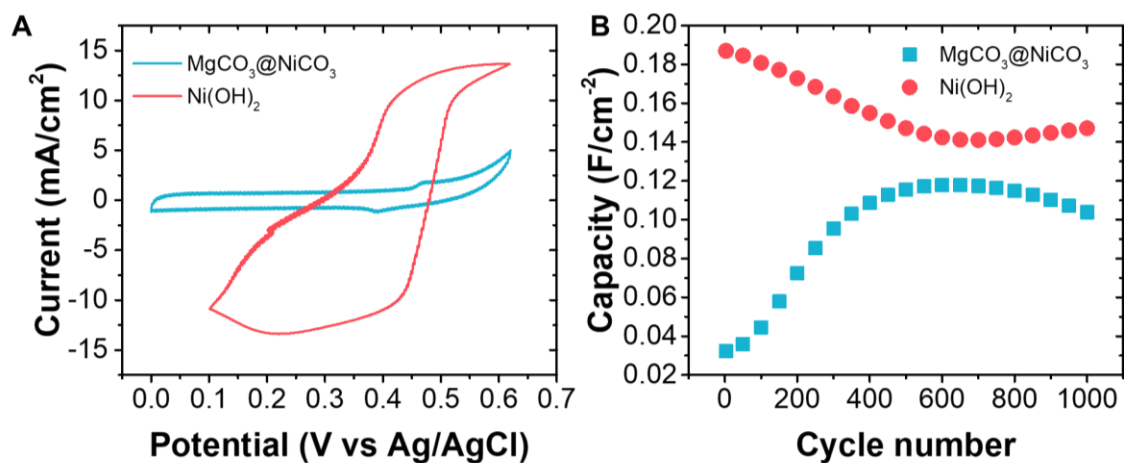

**Figure S8.** Comparison of  $\text{MgCO}_3@\text{NiCO}_3$  and  $\text{Ni}(\text{OH})_2$ . **(A)** Cyclic voltammetry (CV) curves of  $\text{MgCO}_3@\text{NiCO}_3$  and  $\text{Ni}(\text{OH})_2$  electrodes collected at the same scan rate; **(B)** Long-term cycling stability of  $\text{MgCO}_3@\text{NiCO}_3$  and  $\text{Ni}(\text{OH})_2$  up to 1000 cycles.

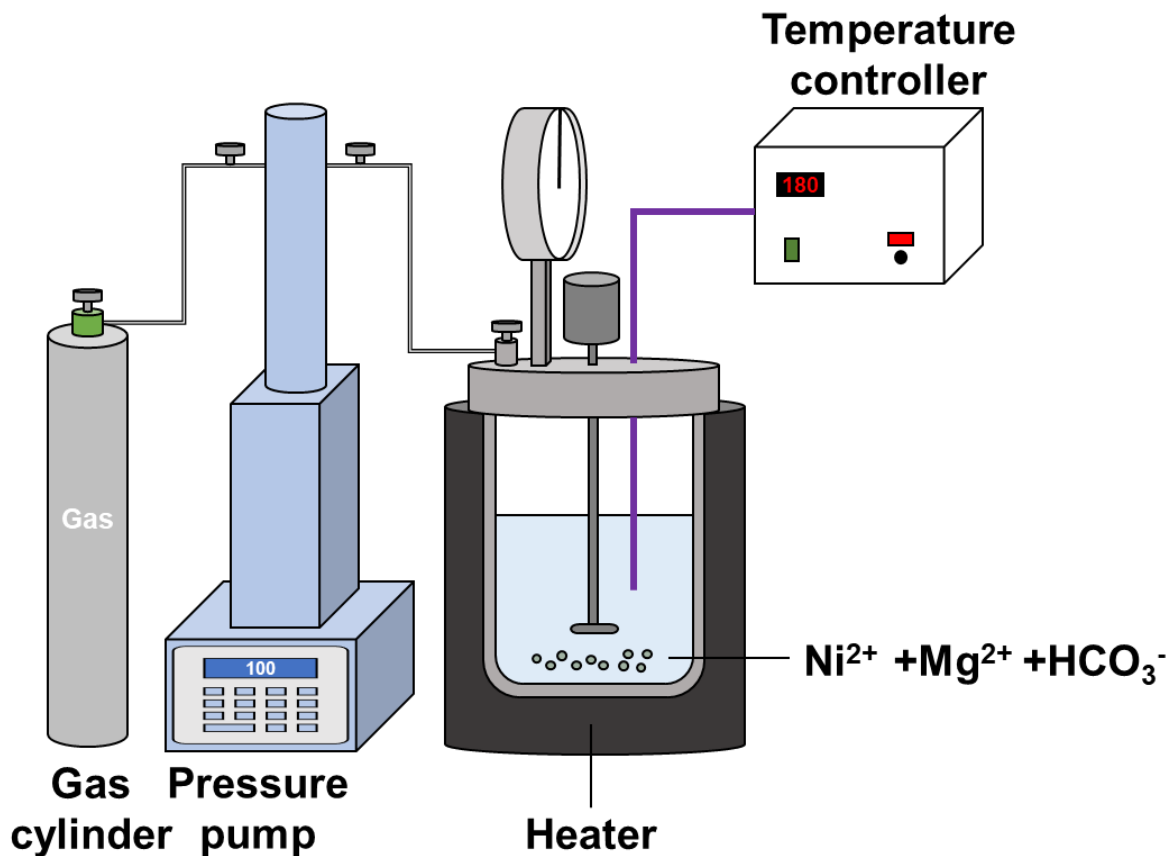

**Figure S9.** The diagram illustrates the high-temperature, high-CO<sub>2</sub>-pressure (high T and P) reactor system used in our experiments. This system includes a CO<sub>2</sub> supply gas cylinder regulated by a pressure pump to maintain precise reactor pressure, and a heater controlled by an external temperature controller to achieve the required high-temperature conditions.

## Reference

1. M. P. Prange, X. Zhang, M. E. Bowden, Z. Shen, E. S. Ilton and S. N. Kerisit, *The Journal of Physical Chemistry C*, 2018, **122**, 10400-10412.
